# Supplementary material for: Synthesis and optical–electrochemical gas sensing applications of Ni-doped LiFePO4 nano-particles
Source: Royal Society of Chemistry journal article supplement (doi:10.1039/c5nj02018b), 2015-10-27

## Synthesis and Optical - electrochemical gas sensing application of Ni-doped $\text{LiFePO}_4$ nano-particle

N. Patima,<sup>a</sup> Y. Abliz,<sup>\*a</sup> and I. Kiminori<sup>b</sup>

*New Journal of Chemistry 2015,10*

**Table. 1** Crystal size of  $\text{LiFe}_{1-0.01x}\text{Ni}_{0.01x}\text{PO}_4$  and  $\text{LiFePO}_4$

| Sample              | $\text{LiFe}_{0.995}\text{Ni}_{0.005}\text{PO}_4$ | $\text{LiFe}_{0.99}\text{Ni}_{0.01}\text{PO}_4$ | $\text{LiFe}_{0.98}\text{Ni}_{0.02}\text{PO}_4$ | $\text{LiFePO}_4$ |
|---------------------|---------------------------------------------------|-------------------------------------------------|-------------------------------------------------|-------------------|
| $\beta_{011}$ (rad) | 0.00317                                           | 0.00254                                         | 0.00114                                         | 0.00269           |
| $\beta_{111}$ (rad) | 0.00254                                           | 0.00302                                         | 0.00292                                         | 0.00269           |
| $\beta_{121}$ (rad) | 0.00432                                           | 0.00314                                         | 0.00482                                         | 0.00293           |
| $\beta_{131}$ (rad) | 0.00241                                           | 0.00252                                         | 0.00228                                         | 0.00252           |
| $D_{hkl}$ (nm)      | 48.0                                              | 49.6                                            | 50.5                                            | 52.4              |

**Fig.1** (a)Schematic view of Optical waveguide gas sensor; (b)detection cell and the operation principle of waveguide

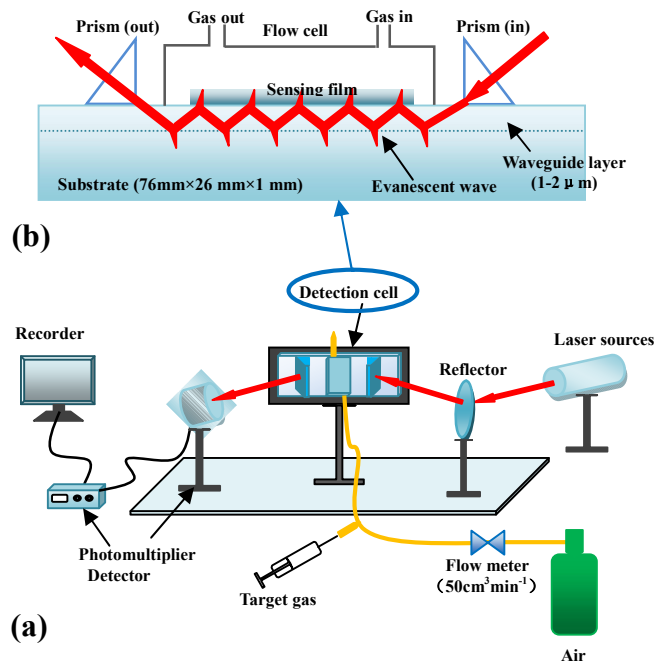

Supplement: c5nj02018b1.pdf [file c5nj02018b1.pdf]
